# Supplementary material for: Integrative Metabolomic and Transcriptomic Analyses Reveal Metabolic Changes and Its Molecular Basis in Rice Mutants of the Strigolactone Pathway
Source: MDPI journal article supplement (doi:10.3390/metabo10110425), 2020-10-26
Supplement: s1 [file s1]

***ADDITIONAL FILE 1***

**Integrative metabolomic and transcriptomic analyses revealed metabolic changes  
and its molecular basis in rice mutants of strigolactone pathway**

Xiujuan Zhou<sup>1</sup>, Ling Liu<sup>1</sup>, Yufei Li<sup>2</sup>, Kang Li<sup>2</sup>, Xiaoli Liu<sup>1</sup>, Junjie Zhou<sup>1</sup>, Chenkun  
Yang<sup>2</sup>, Xianqing Liu<sup>1</sup>, Chuanying Fang<sup>1,\*</sup>, and Jie Luo<sup>1,2\*</sup>

<sup>1</sup>College of Tropical Crops, Hainan University, Haikou, Hainan 570288, China

<sup>2</sup>National Key Laboratory of Crop Genetic Improvement and National Center of Plant  
Gene Research (Wuhan), Huazhong Agricultural University, Wuhan 430070, China

\*Correspondence: cyfang@hainanu.edu.cn (C. Fang), jie.luo@hainanu.edu.cn (J. Luo)

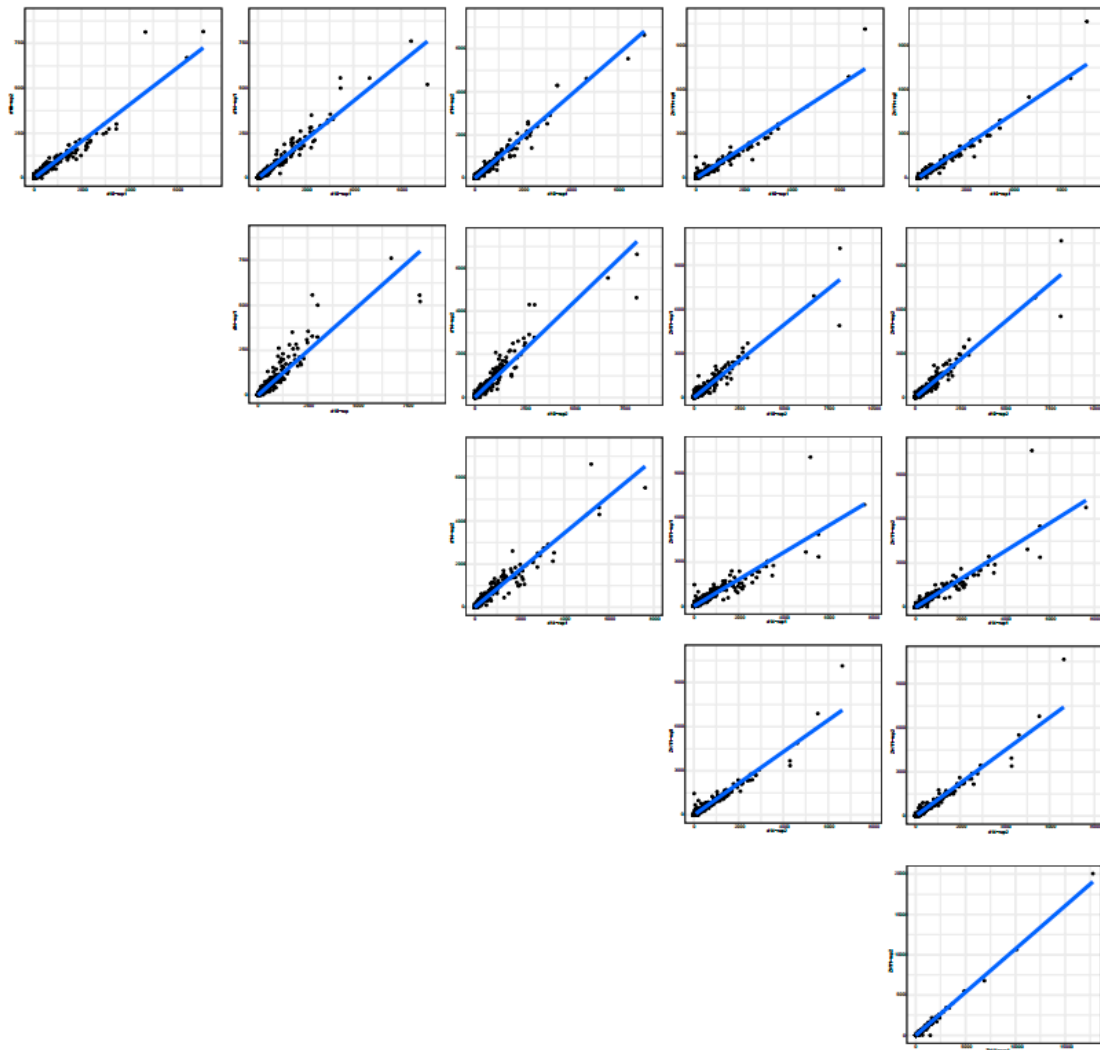

**Figure S1.** Correlation analysis of transcriptome data from each biological replicate of mutants and WT. The data used to plot is the FPKM value.

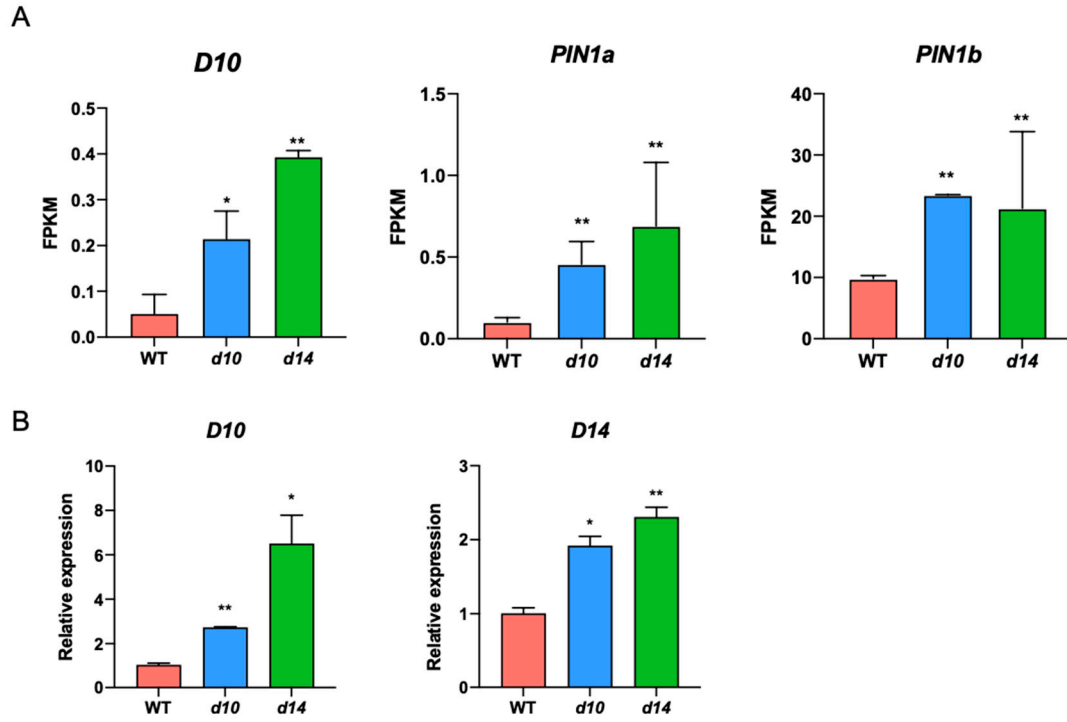

**Figure S2.** The expression of DEGs in *d10*, *d14* and WT. (A) Average gene expression levels of *D10* (LOC\_Os01g54270), *PIN1a* (LOC\_Os06g12610) and *PIN1b* (LOC\_Os02g50960) in *d10*, *d14* and WT. The error bar represents mean value  $\pm$  SD. The p-values were calculated using DESeq2 in R (compared with WT \* $p < 0.05$ , \*\* $p < 0.01$ ). (B) qRT-PCR based expression levels of *D10*, *D14* in *d10*, *d14* and WT. The data are represented as mean  $\pm$  SD of two biological replicates. The Student's t-test analysis indicates a significant difference (compared with WT, \* $p < 0.05$ , \*\* $p < 0.01$ ).

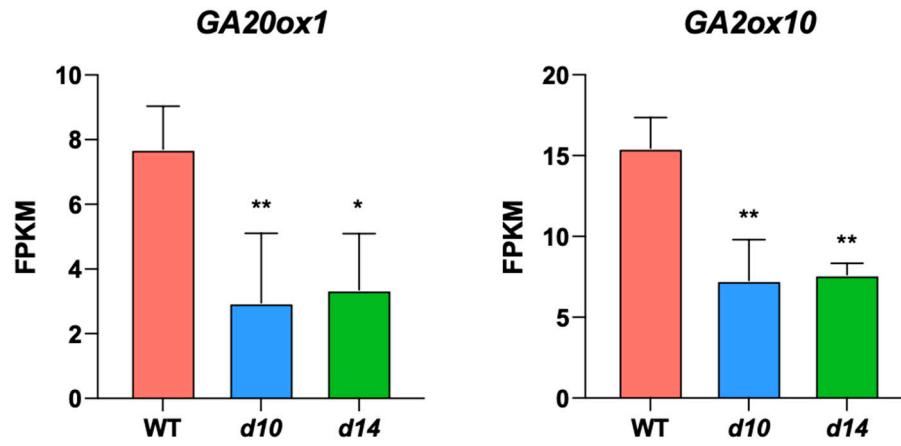

**Figure S3.** Expression level of genes involved in gibberellin (GA) pathway. The error bar represents mean value  $\pm$  SD. The  $p$ -values were calculated using DESeq2 in R (compared with WT, \* $p < 0.05$ , \*\* $p < 0.01$ ).

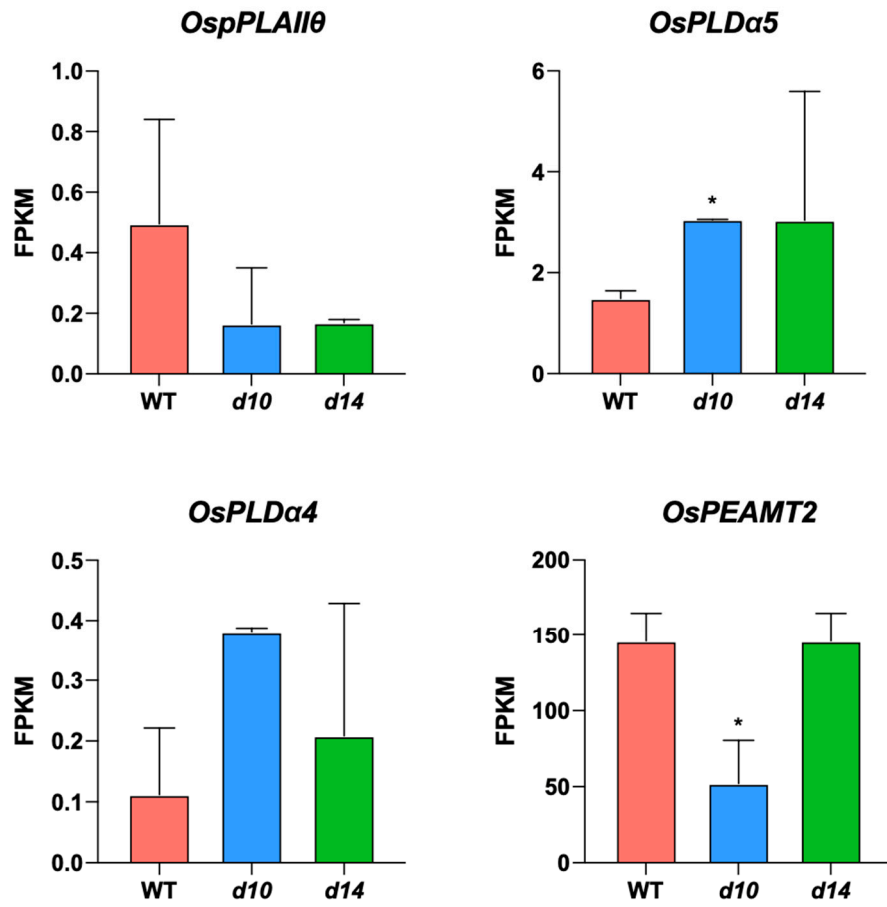

**Figure S4.** Expression level of genes with potential roles in lipid metabolism. The error bar represents mean value  $\pm$  SD. The  $p$ -values were calculated using DESeq2 in R (compared with WT, \* $p < 0.05$ , \*\* $p < 0.01$ ).
